# Supplementary material
Source: MDPI journal article supplement (https://www.mdpi.com/2220-9964/2/3/665)
Supplement: s1 [file s1]

## Dynamics of Sheep Production in Brazil

Potira Meirelles Hermuche <sup>1,\*</sup>, Rebecca Lima Albuquerque Maranhão <sup>1</sup>,  
Renato Fontes Guimarães <sup>1</sup>, Osmar Abílio de Carvalho Júnior <sup>1</sup>,  
Roberto Arnaldo Trancoso Gomes <sup>1</sup>, Samuel Rezende Paiva <sup>2,3</sup> and Concepta McManus <sup>4</sup>

<sup>1</sup> Department of Geography, University of Brasília, Brasília-DF, CEP 70910-900, Brazil;  
E-Mails: rebeccalima.albuquerque@gmail.com (R.L.A.M.); renatofg@unb.br (R.F.G.);  
osmarjr@unb.br (O.A.C.J.); robertogomes@unb.br (R.A.T.G.)

<sup>2</sup> Embrapa Recursos Genéticos e Biotecnologia, Parque Estação Biológica,  
Avenida W5 Norte (Final), Brasília-DF, CEP 70770-917, Brazil;  
E-Mail: samuel.paiva@embrapa.br

<sup>3</sup> Embrapa Sede, Secretaria de Relações Internacionais, Edifício Embrapa Sede-Prédio CECAT-3<sup>o</sup>  
Andar Parque Estação Biológica-PqEB, Av. W3 Norte, Brasília-DF, CEP 70770-901, Brazil

<sup>4</sup> Department of Zootechnia, Federal University of Rio Grande do Sul, Porto Alegre-RS,  
CEP 90040-060, Brazil; E-Mail: concepta.mcmanus@ufrgs.br

\* Author to whom correspondence should be addressed; E-Mail: potira@unb.br;  
Tel.: +55-61-3107-7264; Fax: +55-61-3107-7361.

---

The equations on page 667, second paragraph, have a mistake. Instead of “ $(\sum \text{latitude} \times \sum \text{production})/\text{Number of municipalities}$  and  $(\sum \text{longitude} \times \sum \text{production})/\text{Number of municipalities}$ ”, it should be  $\sum(\text{latitude} \times \text{production})/\text{Number of municipalities}$ , and  $\sum(\text{longitude} \times \text{production})/\text{Number of municipalities}$ .

We apologize for any inconvenience this may have caused.

© 2014 by the authors; licensee MDPI, Basel, Switzerland. This article is an open access article distributed under the terms and conditions of the Creative Commons Attribution license (<http://creativecommons.org/licenses/by/3.0/>).
