# Supplementary material
Source: MDPI journal article supplement (https://www.mdpi.com/2220-9964/2/3/665)
Supplement: s1 [file s1]

Archive with 2 entries (2 files):
- ijgi-02-00665-correction metarial.pdf
- ijgi-02-00665-note.pdf
